# Supplementary material
Source: PubMed Central journal article supplement (PMC7567332)
Supplement: NIHMS1621271-supplement-1.pdf [file NIHMS1621271-supplement-1.pdf]

## Supporting Information

**Title**

Surfaces and Interfaces of Liquid Metal Core-Shell Nanoparticles under the Microscope

*Sabrina S. Hafiz, Daniela Labadini, Ryan Riddell, Erich Wolff, Marvin Xavierselvan, Paul Huttunen, Srivalleesha Mallidi and Michelle Foster\**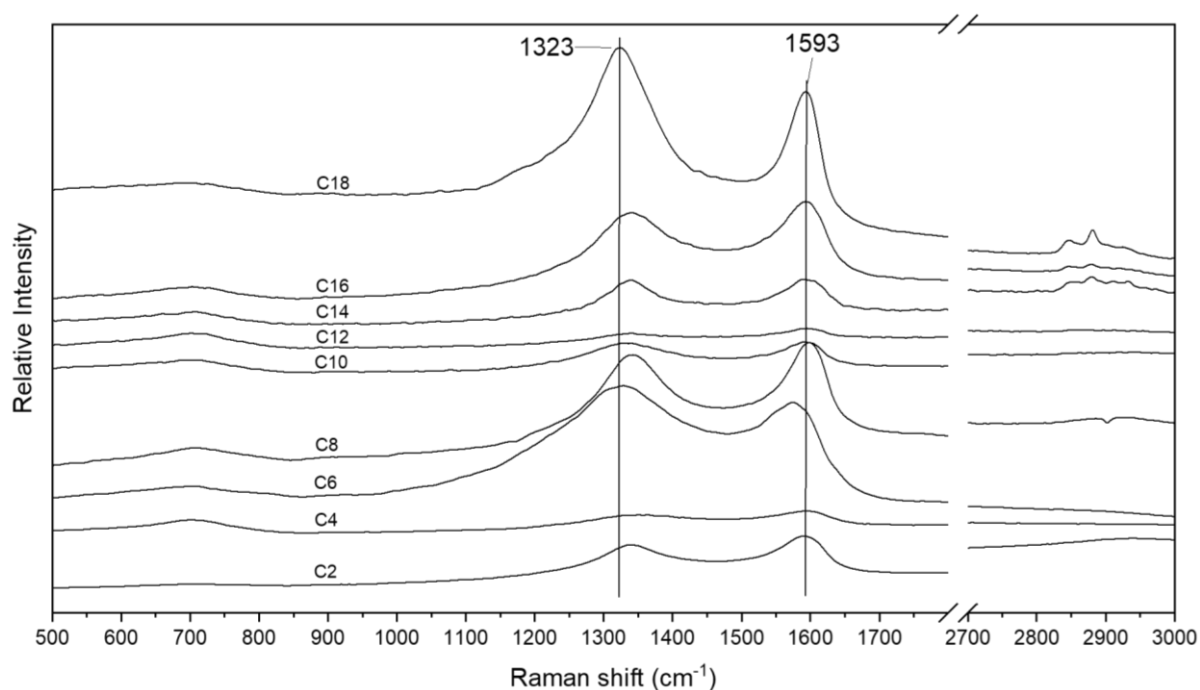

**Figure S1** Raman spectra of EGaIn CSNs coated with carboxylic acids of different alkyl chain length (C2-C18)

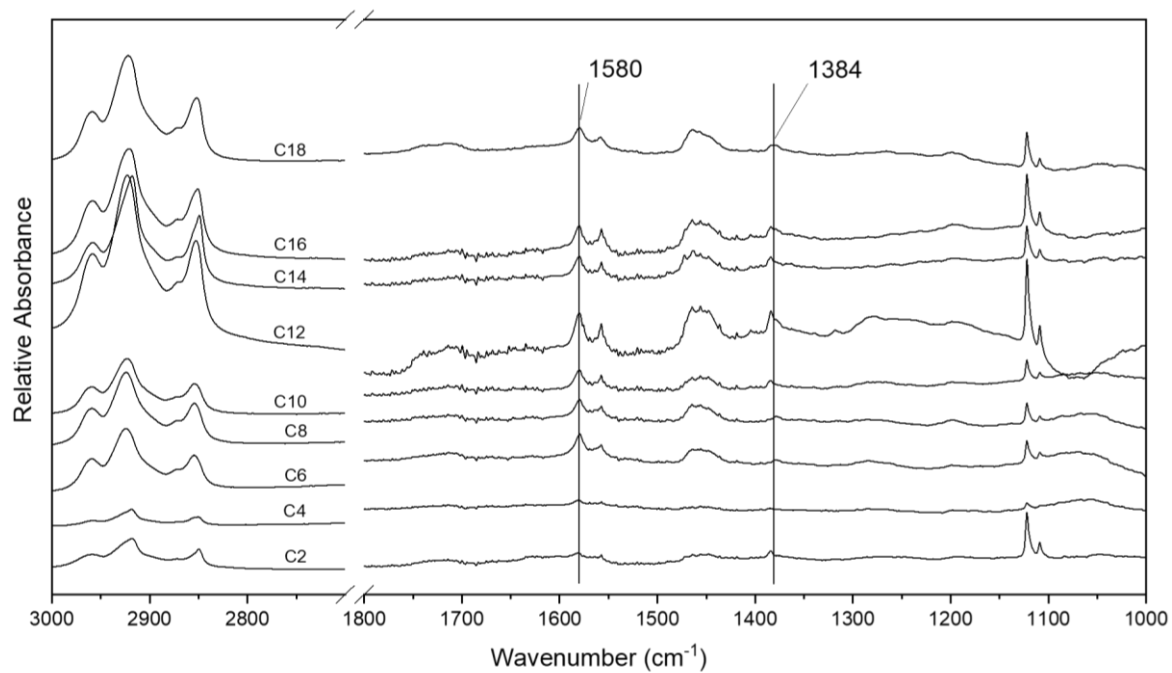

**Figure S2** DRIFTS spectra of EGaIn CSNs coated with carboxylic acids of different alkyl chain length (C2-C18)

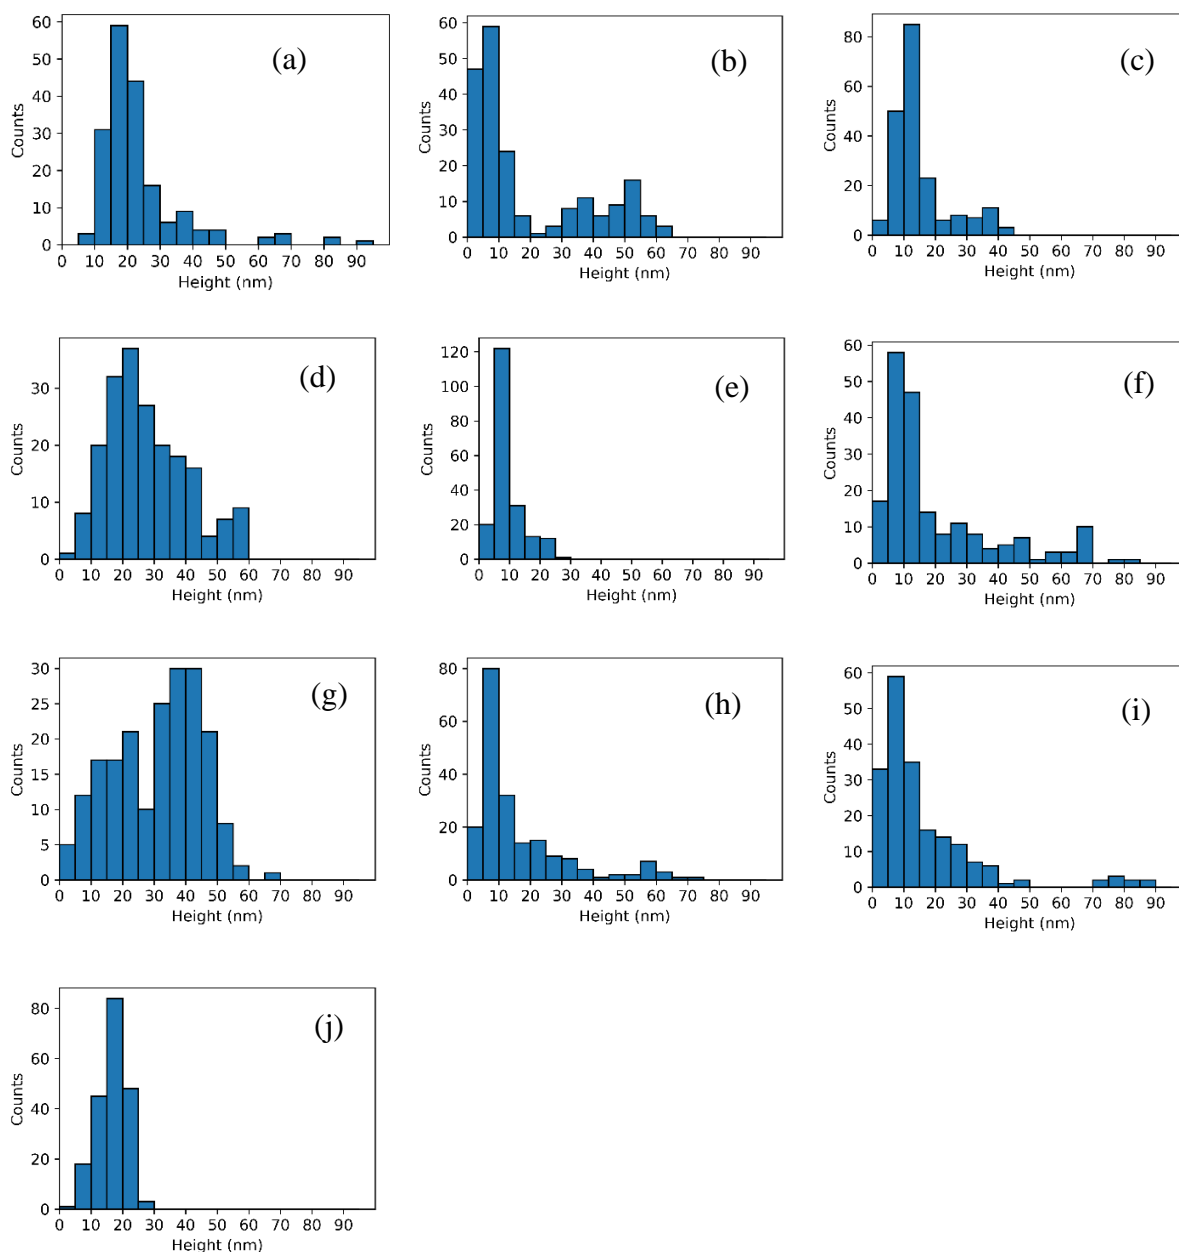

**Figure S3** AFM size distribution of 200 EGaIn CSNs coated with different carboxylic acids (a)

C0 (b) C2 (c) C4 (d) C6 (e) C8 (f) C10 (g) C12 (h) C14 (i) C16 (j) C18.

| <i>Ligand precursors</i> | <i>Ligand Identifiers</i> | <i>Polydispersity index (PDI)</i> | <i>Standard deviation</i> |
|--------------------------|---------------------------|-----------------------------------|---------------------------|
| Stearic Acid             | C18                       | 0.953                             | 0.075                     |
| Palmitic Acid            | C16                       | 0.706                             | 0.205                     |
| Myristic Acid            | C14                       | 0.422                             | 0.515                     |
| Lauric Acid              | C12                       | 0.807                             | 0.197                     |
| Decanoic Acid            | C10                       | 0.818                             | 0.033                     |
| Octanoic acid            | C8                        | 0.625                             | 0.346                     |
| Hexanoic Acid            | C6                        | 0.673                             | 0.219                     |
| Butanoic Acid            | C4                        | 0.94                              | 0.103                     |
| Acetic Acid              | C2                        | 0.585                             | 0.214                     |
| Ethanol                  | C0                        | 0.843                             | 0.082                     |

**Table S4** Polydispersity indices of EGaIn CSNs coated with all the carboxylate acids from DLS measurements

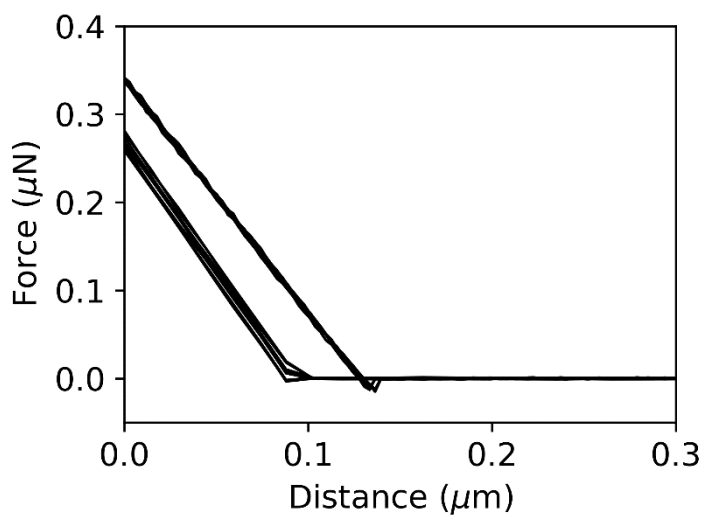

**Figure S5** 15 approach curves for C8 used to calculate average shell stiffness

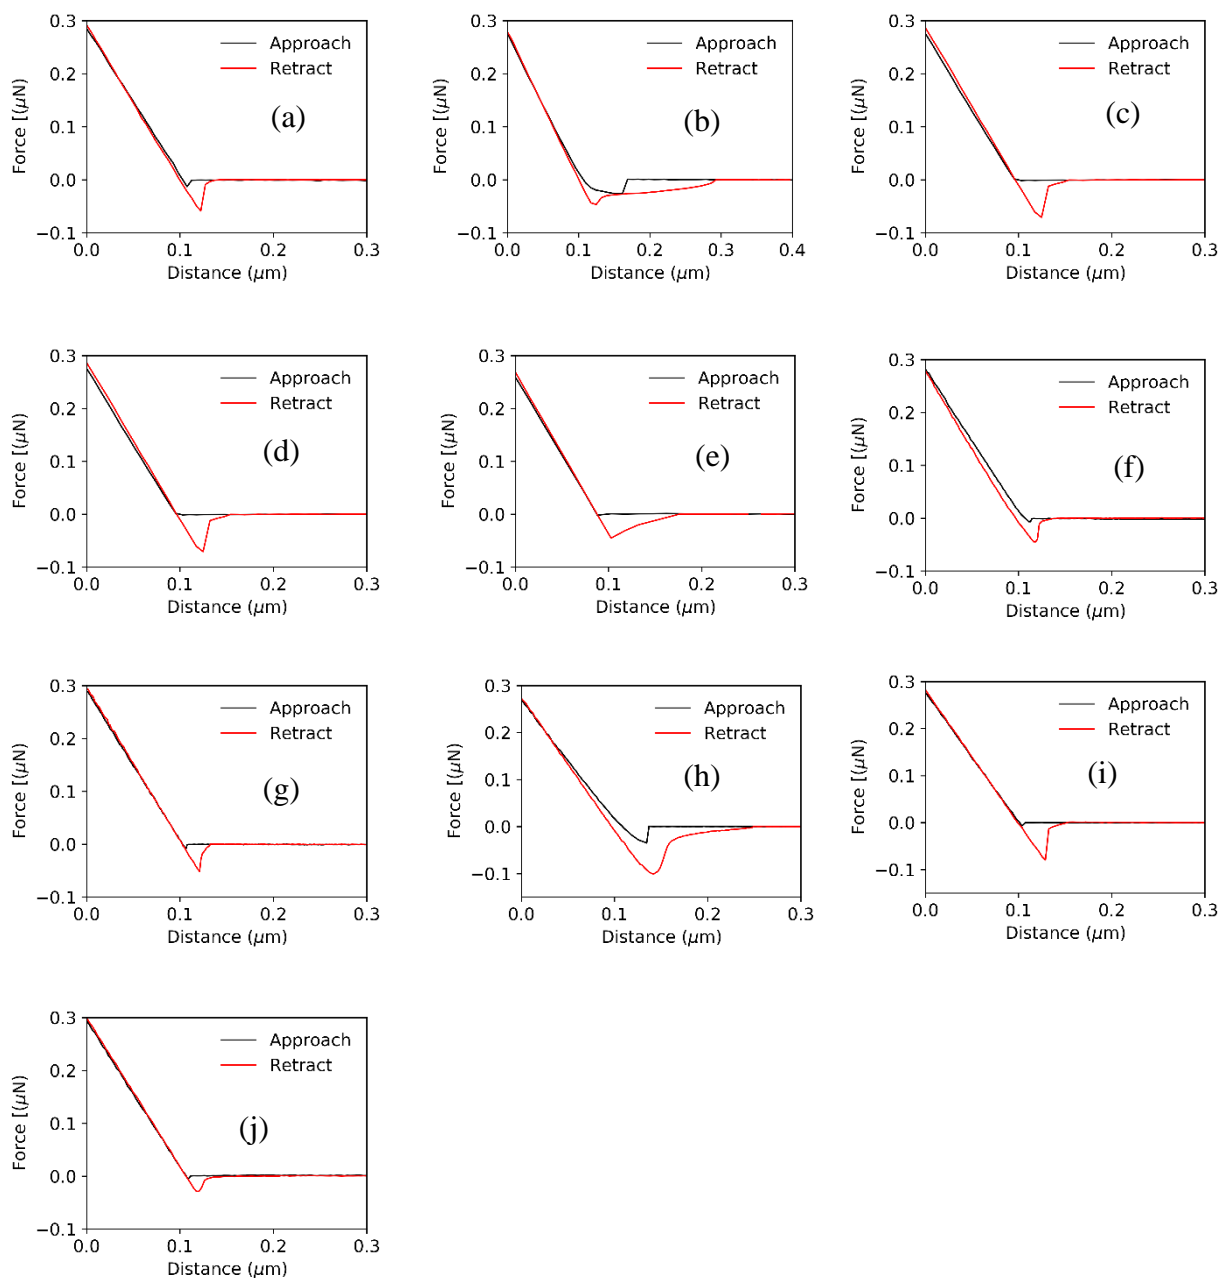

**Figure S6** Force distance curves of EGaIn CSNs coated with different carboxylic acids (a) C0 (b) C2 (c) C4 (d) C6 (e) C8 (f) C10 (g) C12 (h) C14 (i) C16 (j) C18.
